# Supplementary material
Source: PubMed Central journal article supplement (PMC5737123)
Supplement: ba009084-suppl1.pdf [file ba009084-suppl1.pdf]

**Supplement Figure 1.** Tregs in patient S versus other allogeneic HSCT patients. Tregs were identified as CD4+CD25+CD127- (these correspond to FoxP3+ subsets, but can be determined without fixation and permeabilization). Protocol 08-160 represents other patients on the K562-GM-CSF AML vaccine trial as reported in this paper. 855 represents a cohort of allogeneic HSCT patients who received similar low dose Bu/flu RIC conditioning regimen without vaccination. Pre-vaccine time points are approximated at one month post-HSCT for all 08-160 patients. Total numbers of patients analyzed were: N = 217 pre-transplant, n = 254 one month post-HSCT, n = 244 two months post-HSCT, and n = 224 three months post-HSCT. Error bars refer to the first and third quartiles.

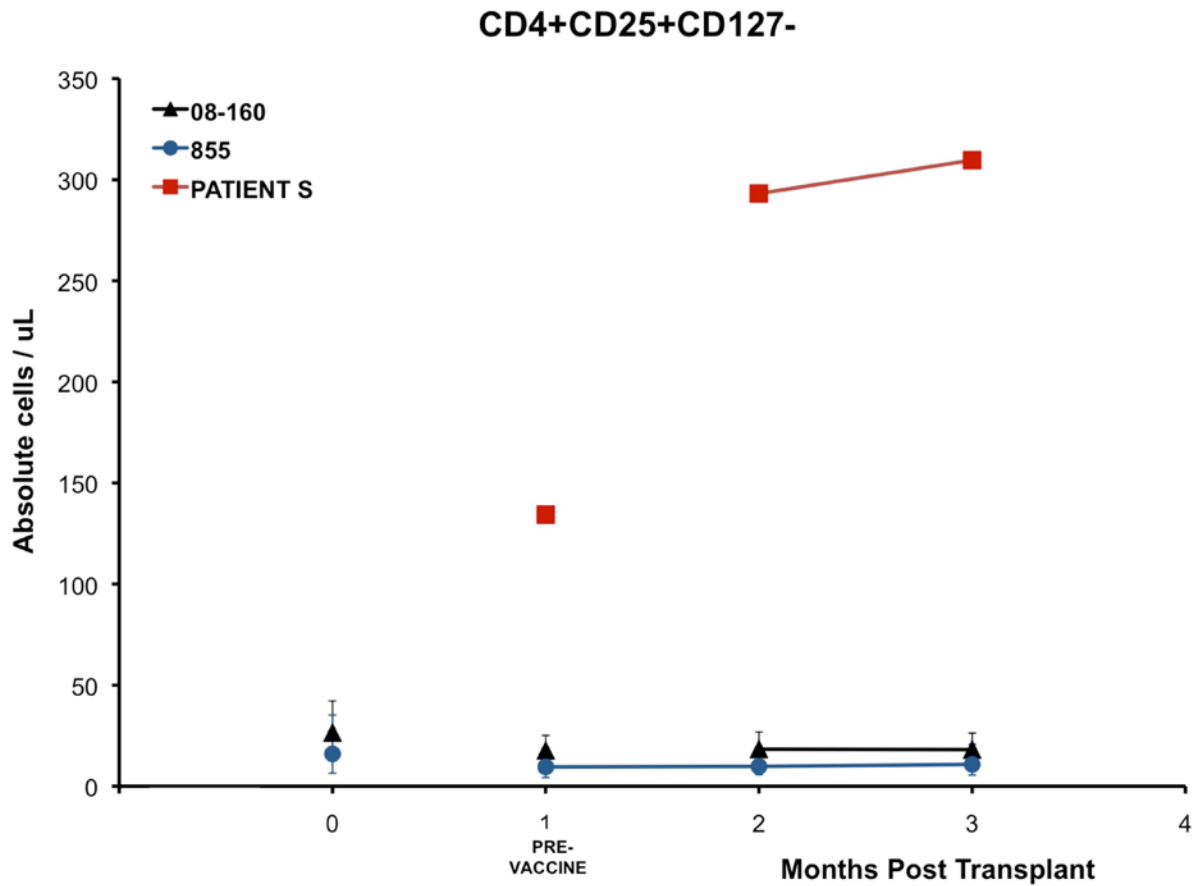

Supplement Table 1. Summary statistics of phenotype data (absolute cells/uL)

|                           |         | N  | Median | Q1    | Q3     | p-value |
|---------------------------|---------|----|--------|-------|--------|---------|
| CD3                       | pre VAX | 22 | 342.6  | 206.4 | 474.4  |         |
|                           | 1       | 29 | 463.3  | 224.8 | 724.1  | 0.048   |
|                           | 2       | 27 | 454.2  | 288.9 | 669.3  | 0.007   |
|                           | 3       | 23 | 463.3  | 263.6 | 872    | 0.09    |
|                           | 6       | 17 | 280.4  | 216.2 | 433.6  | 1.00    |
|                           | 9       | 11 | 431.8  | 214.2 | 523.3  | 0.95    |
|                           | 12      | 9  | 616.5  | 436.4 | 783.1  | 0.56    |
|                           | 18      | 10 | 661    | 509.2 | 1174.4 | 0.19    |
| CD4                       | pre VAX | 22 | 186    | 112.3 | 265.4  |         |
|                           | 1       | 29 | 196.4  | 159.2 | 356.2  | 0.11    |
|                           | 2       | 27 | 254.5  | 156.9 | 318.2  | 0.0004  |
|                           | 3       | 23 | 259.1  | 116.6 | 413.8  | 0.18    |
|                           | 6       | 17 | 150.3  | 66.6  | 209.2  | 0.85    |
|                           | 9       | 11 | 182.8  | 117.6 | 268.6  | 0.95    |
|                           | 12      | 9  | 298.3  | 128.9 | 355.1  | 0.69    |
|                           | 18      | 10 | 299.7  | 255.4 | 415.5  | 0.31    |
| CD4+25+127-<br>(CD4+Treg) | pre VAX | 22 | 17.7   | 13.5  | 25.5   |         |
|                           | 1       | 29 | 18.5   | 14.8  | 26.5   | 0.50    |
|                           | 2       | 27 | 18.1   | 14.8  | 28.4   | 0.23    |
|                           | 3       | 23 | 17.8   | 10.2  | 32.7   | 0.74    |
|                           | 6       | 17 | 17.3   | 5     | 24.3   | 0.92    |
|                           | 9       | 11 | 15.3   | 9.3   | 30.7   | 0.95    |
|                           | 12      | 9  | 22.4   | 12.5  | 31.7   | 0.69    |
| CD4+Tcon                  | pre VAX | 20 | 168.3  | 99.2  | 227.3  |         |
|                           | 1       | 20 | 162.8  | 126.7 | 255.4  | 0.07    |
|                           | 2       | 22 | 220.8  | 140.4 | 269    | 0.0003  |
|                           | 3       | 19 | 235.8  | 109.5 | 403.8  | 0.14    |
|                           | 6       | 15 | 135.5  | 75.3  | 192.5  | 0.85    |
|                           | 9       | 11 | 173.4  | 97.7  | 235.6  | 0.95    |
|                           | 12      | 9  | 278.5  | 116.4 | 320.6  | 0.56    |
|                           | 18      | 10 | 280.7  | 214.8 | 378.5  | 0.31    |
| CD8+                      | pre VAX | 22 | 97.6   | 66.4  | 201.7  |         |
|                           | 1       | 29 | 159.1  | 70.6  | 360.5  | 0.05    |
|                           | 2       | 27 | 150.3  | 62.7  | 321.3  | 0.15    |
|                           | 3       | 23 | 155.8  | 43.2  | 308.6  | 0.16    |
|                           | 6       | 17 | 106.6  | 79.8  | 147    | 0.85    |

|         |         |    |       |       |       |        |
|---------|---------|----|-------|-------|-------|--------|
|         | 9       | 11 | 123.9 | 60    | 305.9 | 0.74   |
|         | 12      | 9  | 207.1 | 100.6 | 369.6 | 0.84   |
|         | 18      | 10 | 265.7 | 154.2 | 839.7 | 0.44   |
| CD56+3- | pre VAX | 22 | 141   | 58    | 269   |        |
|         | 1       | 29 | 127   | 83    | 224   | 0.44   |
|         | 2       | 27 | 128   | 81    | 193   | 0.13   |
|         | 3       | 23 | 99    | 69    | 146   | 0.19   |
|         | 6       | 17 | 91    | 72    | 128   | 0.23   |
|         | 9       | 11 | 123   | 65    | 180   | 0.38   |
|         | 12      | 9  | 139   | 101   | 218   | 0.56   |
|         | 18      | 10 | 154   | 86    | 261   | 0.31   |
| CD56+3+ | pre VAX | 22 | 17    | 5     | 35    |        |
|         | 1       | 29 | 19    | 12    | 57    | 0.83   |
|         | 2       | 27 | 18    | 11    | 53    | 1.00   |
|         | 3       | 23 | 28    | 5     | 50    | 0.78   |
|         | 6       | 17 | 15    | 8     | 30    | 1.00   |
|         | 9       | 11 | 8     | 2     | 14    | 0.04   |
|         | 12      | 9  | 14    | 12    | 19    | 0.03   |
|         | 18      | 10 | 14    | 7     | 35    | 0.81   |
| CD19+   | pre VAX | 21 | 5     | 1     | 15    |        |
|         | 1       | 28 | 29    | 9     | 66    | <.0001 |
|         | 2       | 27 | 29    | 7     | 108   | <.0001 |
|         | 3       | 22 | 31    | 13    | 78    | 0.0009 |
|         | 6       | 17 | 16    | 2     | 121   | 0.027  |
|         | 9       | 11 | 169   | 23    | 332   | 0.016  |
|         | 12      | 9  | 144   | 81    | 384   | 0.031  |
|         | 18      | 10 | 266   | 78    | 535   | 0.06   |

Q1: 25<sup>th</sup> percentile value; Q3: 75<sup>th</sup> percentile value.

p-value: from 2-sided Wilcoxon signed rank test comparing post vaccination values to pre vaccination values.

(note: As shown in Figure 4, at 2 months after the 1<sup>st</sup> vaccination, the T cell (CD3, CD4, CD8) counts were significantly increased compared to the pre-vaccination counts. At 6 months after 1<sup>st</sup> vaccination (all vaccination were completed by 3 months), the CD3 and CD4 counts briefly went back to the pre-vaccination level, but then gradually increased.)
